# Supplementary material for: Occupational Exposure to Polycyclic Aromatic Hydrocarbons and Lung Cancer Risk: Results from a Pooled Analysis of Case–Control Studies (SYNERGY)
Source: Oxford University Press journal article supplement (doi:10.1158/1055-9965.epi-21-1428), 2022-04-18
Supplement: epi-21-1428_supplementary_tables_1-2_and_supplementary_figure_1_supp1.docx [file epi-21-1428_supplementary_tables_1-2_and_supplementary_figure_1_supp1.docx]

Supplementary materials:

# Occupational exposure to polycyclic aromatic hydrocarbons and lung cancer risk: results from a pooled analysis of case-control studies (SYNERGY)

Ann Olsson1, Neela Guha2, Liacine Bouaoun1, Hans Kromhout3, Susan Peters3, Jack Siemiatycki4, Vikki Ho4,
Per Gustavsson5, Paolo Boffetta6,7, Roel Vermeulen3, Thomas Behrens8, Thomas Brüning8, Benjamin Kendzia8, Pascal Guénel9, Danièle Luce10, Stefan Karrasch11,12, Heinz-Erich Wichmann12,13, Dario Consonni14, Maria Teresa Landi15, Neil E. Caporaso15, Franco Merletti16, Dario Mirabelli16,Lorenzo Richiardi16, Karl-Heinz Jöckel17, Wolfgang Ahrens18,19, Hermann Pohlabeln18, Adonina Tardón20, David Zaridze21, John K. Field22, Jolanta Lissowska23, Beata Świątkowska24, John R. McLaughlin25, Paul A. Demers26, Vladimir Bencko27, Lenka Foretova28, Vladimir Janout29, Tamás Pándics30, Eleonora Fabianova31,32, Dana Mates33, Francesco Forastiere34,Bas Bueno-de-Mesquita35, Joachim Schüz1, Kurt Straif36,37

1. International Agency for Research on Cancer (IARC/WHO), Lyon, France

2. Office of Environmental Health Hazard Assessment, California Environmental Protection Agency; Oakland, CA, USA

3. Institute for Risk Assessment Sciences, Utrecht University, Utrecht, The Netherlands

4. Department of Social and Preventive Medicine, University of Montreal, Montreal, Canada.

5. Institute of Environmental Medicine, Karolinska Institutet, Stockholm, Sweden

6. Stony Brook Cancer Center, Stony Brook University, Stony Brook, NY, USA

7. Department of Medical and Surgical Sciences, University of Bologna, Bologna, Italy

8. Institute for Prevention and Occupational Medicine of the German Social Accident Insurance, Institute of the Ruhr University (IPA), Bochum, Germany

9. Center for research in Epidemiology and Population Health (CESP), Exposome and Heredity team, Inserm U1018, University Paris-Saclay, Villejuif, France

10. Univ Rennes, Inserm, EHESP, Irset (Institut de recherche en santé, environnement et travail) - UMR_S 1085, Pointe-à-Pitre, France

11. Institute and Clinic for Occupational, Social and Environmental Medicine, University Hospital, LMU Munich; Comprehensive Pneumology Center Munich (CPC-M), Member of the German Center for Lung Research (DZL), Munich, Germany

12. Institute of Epidemiology, Helmholtz Zentrum München – German Research Center for Environmental Health, Neuherberg, Germany

13. Institut für Medizinische Informatik Biometrie Epidemiologie, Ludwig Maximilians University, Munich, Germany

14. Epidemiology Unit, Fondazione IRCCS Ca’ Granda Ospedale Maggiore Policlinico, Milan, Italy

15. Division of Cancer Epidemiology and Genetics, National Cancer Institute, NIH, Bethesda, MD, USA

16. Cancer Epidemiology Unit, Department of Medical Sciences, University of Turin, Turin, Italy

17. Institute for Medical Informatics, Biometry and Epidemiology (IMIBE), University Hospital Essen, Essen, Germany

18. Leibniz Institute for Prevention Research and Epidemiology - BIPS, Bremen, Germany

19. University of Bremen, Faculty of Mathematics and Computer Science, Institute of Statistics, Bremen, Germany

20. Department of Public Health, University of Oviedo. ISPA and CIBERESP, Oviedo, Spain

21. Department of cancer epidemiology and Prevention, N.N. Blokhin National Research Centre of oncology, Moscow, Russia

22. Roy Castle Lung Cancer Research Programme, Department of Molecular and Clinical Cancer Medicine, University of Liverpool, Liverpool, UK

23. Epidemiology Unit, Department of Cancer Epidemiology and Prevention, M. Sklodowska-Curie National Research Institute of Oncology, Warsaw, Poland

24. Department of Environmental Epidemiology, The Nofer Institute of Occupational Medicine, Lodz, Poland

25. Dalla Lana School of Public Health, University of Toronto, Toronto, Canada

26. Occupational Cancer Research Centre, Ontario Health, Toronto, Canada

27. Institute of Hygiene and Epidemiology, First Faculty of Medicine, Charles University, Prague, Czech Republic

28. Masaryk Memorial Cancer Institute, Brno, Czech Republic

29. Faculty of Health Sciences, Palacky University, Olomouc, Czech Republic

30. National Public Health Center, Budapest, Hungary

31. Regional Authority of Public Health, Banská Bystrica, Slovakia

32. Faculty of Health, Catholic University, Ružomberok, Slovakia

33. National Institute of Public Health, Bucharest, Romania

34. Department of Epidemiology, ASL Roma E, Rome, Italy

35. Former senior scientist, Centre for Nutrition, Prevention and Health Services, National Institute for Public Health and the Environment (RIVM), Bilthoven, The Netherlands

36. ISGlobal, Barcelona, Spain

37. Boston College, MA, USA

Corresponding author: Ann Olsson, Environment and Lifestyle Epidemiology Branch, International Agency for Research on Cancer, 150 cours Albert Thomas, 69372 Lyon CEDEX 08, France. Phone: 33 (0)4-7273-8152; E-mail: olssona@iarc.fr

Supplementary Table S1. Characteristics of studies included in the SYNERGY pooled analysis

| **Study Acronym** | **Country** | **Time period of PAH exposure** | **Control source** | **Control (n=20965)** | **Controls Ever exposed PAH %** | **Control partici-pation %** | **Case (n=16901)** | **Cases Ever exposed PAH %** | **Case partici-pation %** |
| --- | --- | --- | --- | --- | --- | --- | --- | --- | --- |
| AUT | Germany | 1932-1994 | P | 3249 | 22.2 | 41 | 3180 | 33.3 | 77 |
| CAPUA | Spain | 1927-2010 | H | 512 | 23.6 | 96 | 559 | 23.3 | 91 |
| EAGLE | Italy | 1931-2005 | P | 2065 | 20.3 | 72 | 1908 | 23.3 | 87 |
| HdA | Germany | 1927-1993 | P | 1002 | 26.2 | 68 | 1004 | 33.6 | 69 |
| ICARE | France | 1941-2007 | P | 3449 | 21.9 | 77 | 2739 | 24.8 | 63 |
| INCO | Czech Republic | 1938-2002 | H | 452 | 24.6 | 80 | 304 | 31.2 | 94 |
| INCO | Hungary | 1938-1999 | H | 305 | 19.0 | 100 | 391 | 17.6 | 90 |
| INCO | Poland | 1940-2001 | H, P | 835 | 19.6 | 88 | 793 | 22.1 | 88 |
| INCO | Romania | 1938-2002 | H | 225 | 24.4 | 99 | 179 | 26.8 | 90 |
| INCO | Russia | 1937-2000 | H | 580 | 37.6 | 90 | 599 | 33.1 | 96 |
| INCO | Slovakia | 1942-2002 | H | 285 | 21.1 | 84 | 345 | 29.0 | 90 |
| INCO/LLP | United Kingdom | 1934-2004 | P | 916 | 34.1 | 84 | 441 | 38.3 | 78 |
| LUCA | France | 1927-1992 | H | 282 | 33.0 | 98 | 280 | 32.5 | 98 |
| LUCAS | Sweden | 1924-1990 | P | 2307 | 14.9 | 85 | 1014 | 18.3 | 87 |
| MONTREAL | Canada | 1937-2002 | P | 1505 | 20.5 | 69 | 1176 | 27.6 | 85 |
| MORGEN | Netherlands | 1947-1994 | P | 115 | 14.8 | N/A | 43 | 27.9 | N/A |
| PARIS | France | 1924-1992 | H | 227 | 22.9 | 95 | 169 | 23.1 | 95 |
| ROME | Italy | 1927-1995 | H | 321 | 17.4 | 63 | 326 | 15.3 | 74 |
| TURIN/ VENETO | Italy | 1922-1994 | P | 1489 | 31.2 | 80 | 1086 | 34.4 | 79 |
| TORONTO | Canada | 1933-2001 | H, P | 844 | 14.1 | 71 | 365 | 16.2 | 62 |

Abbreviations: P, population-based controls; H, hospital-based controls;

Supplementary Table S2. Overall lung cancer risk associated with various metrics of occupational PAH exposure, without adjustment for List A-

|  | Men |  |  |  |  |  | Women |  |  |  |  |  |
| --- | --- | --- | --- | --- | --- | --- | --- | --- | --- | --- | --- | --- |
| PAH exposure | Cases | % | Controls | % | OR | 95% CI | Cases | % | Controls | % | OR | 95% CI |
|
| Occupational exposure |  |  |  |  |  |  |  |  |  |  |  |  |
| Never | 9584 | 70.4 | 12374 | 75.2 | 1.00 | Ref | 2678 | 81.2 | 3878 | 85.9 | 1.00 | Ref |
| Ever | 4021 | 29.6 | 4077 | 24.8 | 1.11 | 1.05-1.18 | 618 | 18.8 | 636 | 14.1 | 1.21 | 1.05-1.39 |
| Duration (years) among exposed |  |  |  |  |  |  |  |  |  |  |  |  |
| 1-9 | 1671 | 12.3 | 1759 | 10.7 | 1.06 | 0.98-1.15 | 323 | 9.8 | 359 | 8.0 | 1.19 | 0.99-1.43 |
| 10-19 | 846 | 6.2 | 832 | 5.1 | 1.17 | 1.05-1.31 | 157 | 4.8 | 157 | 3.5 | 1.21 | 0.93-1.57 |
| 20-29 | 613 | 4.5 | 602 | 3.7 | 1.13 | 0.99-1.29 | 81 | 2.5 | 69 | 1.5 | 1.28 | 0.88-1.85 |
| 30+ | 891 | 6.5 | 884 | 5.4 | 1.14 | 1.02-1.27 | 57 | 1.7 | 51 | 1.1 | 1.23 | 0.79-1.91 |
| *Test for trend, p-value§* | | | |  | *0.0004* |  |  |  |  |  | *0.016* |  |
| *Test for trend, p-value (exposed only) §* | | | |  | *0.43* |  |  |  |  |  | *0.99* |  |
| Cumulative exposure [(BaP) µg/m3-years] among exposed |  |  |  |  |  |  |  |  |  |  |  |  |
| <0.10 | 859 | 6.3 | 950 | 5.8 | 1.01 | 0.90-1.12 | 199 | 6.0 | 214 | 4.7 | 1.24 | 0.98-1.55 |
| <0.24 | 967 | 7.1 | 984 | 6.0 | 1.10 | 0.99-1.22 | 177 | 5.4 | 207 | 4.6 | 1.10 | 0.87-1.40 |
| <0.52 | 1021 | 7.5 | 1024 | 6.2 | 1.18 | 1.07-1.31 | 172 | 5.2 | 155 | 3.4 | 1.27 | 0.98-1.64 |
| 0.52-1.83 | 1174 | 8.6 | 1119 | 6.8 | 1.14 | 1.04-1.26 | 70 | 2.1 | 60 | 1.3 | 1.31 | 0.88-1.96 |
| *Test for trend, p-value§* | | | |  | *<0.001* |  |  |  |  |  | *0.012* |  |
| *Test for trend, p-value (exposed only) §* | | | |  | *0.15* |  |  |  |  |  | *0.81* |  |

Abbreviations: PAH, polycyclic aromatic hydrocarbons; BaP, benzo[a]pyrene; OR, odds ratio; CI confidence intervals; Ref, reference category.
OR adjusted for study, age-group, cigarette pack years, time since quitting smoking
§ p-value obtained using the ordinal variable for respective exposure index

Supplementary Figure S1. Bar plots showing the additive interaction between tobacco smoking and occupational PAH exposure on the risk of lung cancer, overall and by histological subtype, by sex


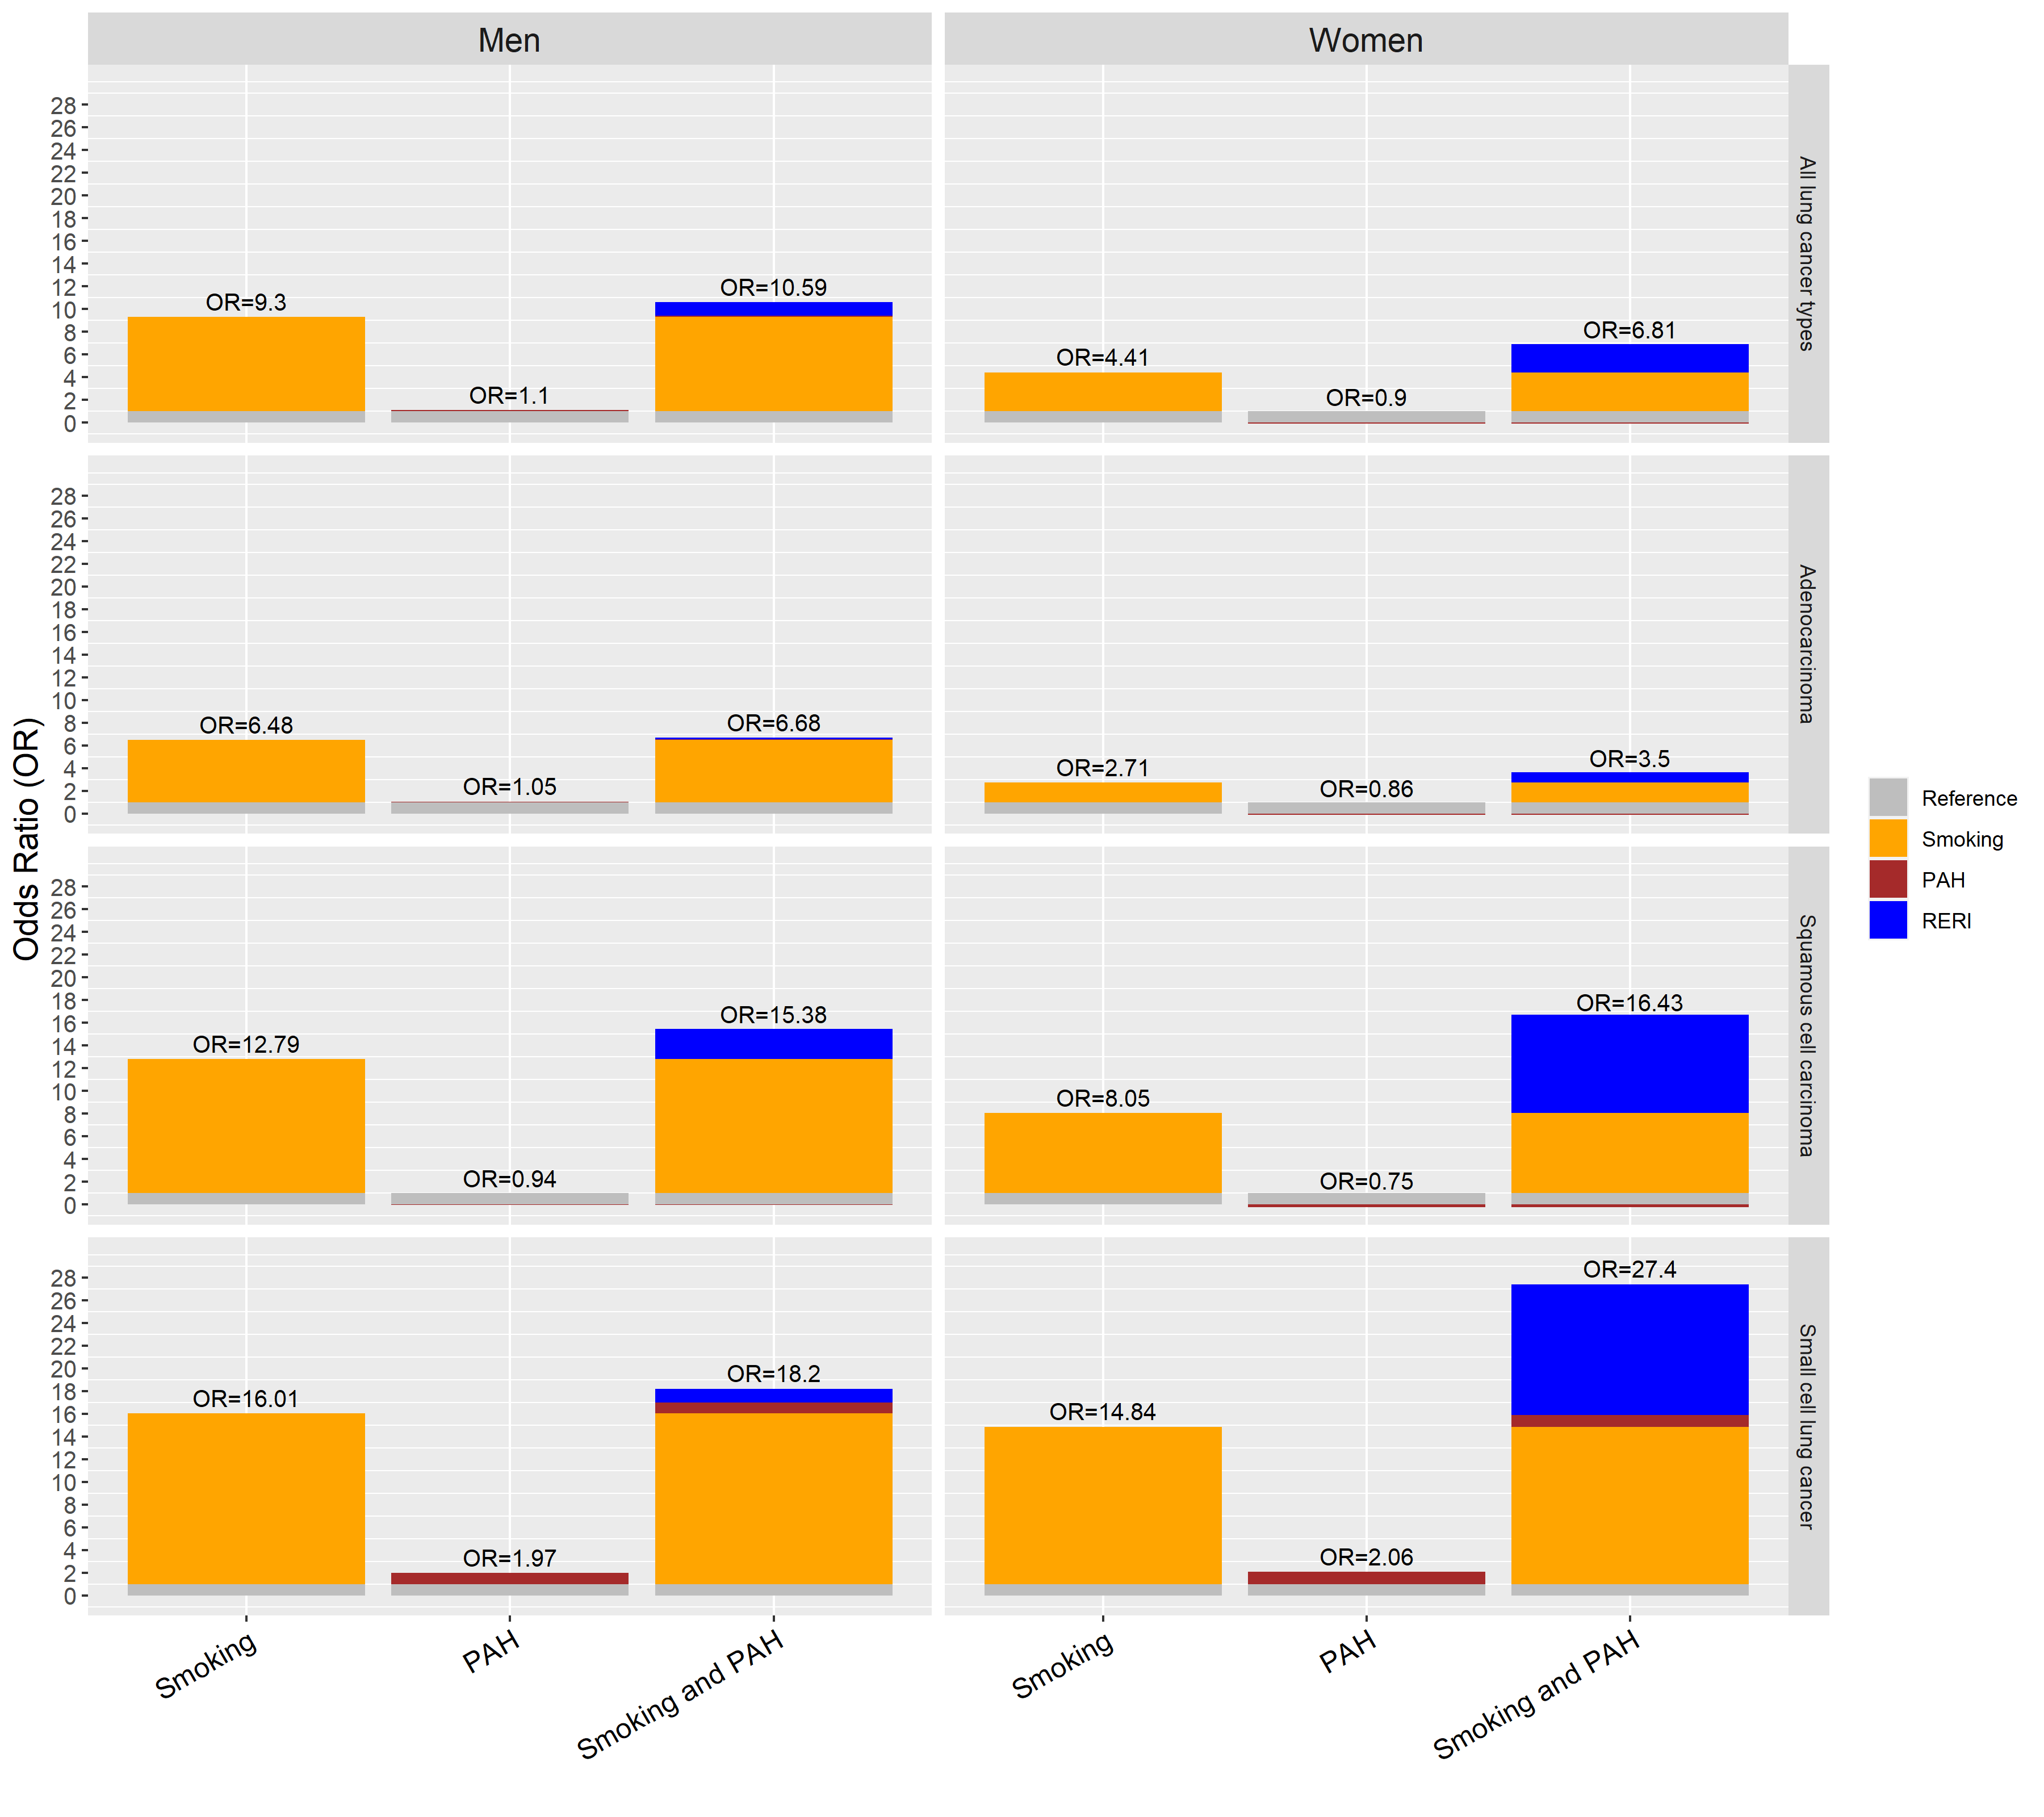


Reference = never smokers and never exposed to PAH; RERI = Relative excess risk due to interaction.
